# Supplementary material for: A Comprehensive Mouse Transcriptomic BodyMap across 17 Tissues by RNA-seq
Source: PubMed Central journal article supplement (PMC5482823; doi:10.1038/s41598-017-04520-z), 2017-06-23
Supplement: 41598_2017_4520_MOESM1_ESM.pdf [file 41598_2017_4520_MOESM1_ESM.pdf]

## Supplementary Information

1  
2  
3  
4  
5  
6  
7  
8  
9  
10  
11  
12  
13  
14  
15

### **A Comprehensive Mouse Transcriptomic BodyMap across 17 Tissues by RNA-seq**

Bin Li<sup>1,2#</sup>, Tao Qing<sup>1,2#</sup>, Jinhang Zhu<sup>1</sup>, Zhuo Wen<sup>1,3</sup>, Ying Yu<sup>1,2</sup>, Ryutaro Fukumura<sup>4</sup>,  
Yuanting Zheng<sup>1,2\*</sup>, Yoichi Gondo<sup>4\*</sup>, and Leming Shi<sup>1,2\*</sup>

\*To whom correspondence should be addressed (yuantingzheng@fudan.edu.cn, gondo@riken.jp, or lemingshi@fudan.edu.cn).

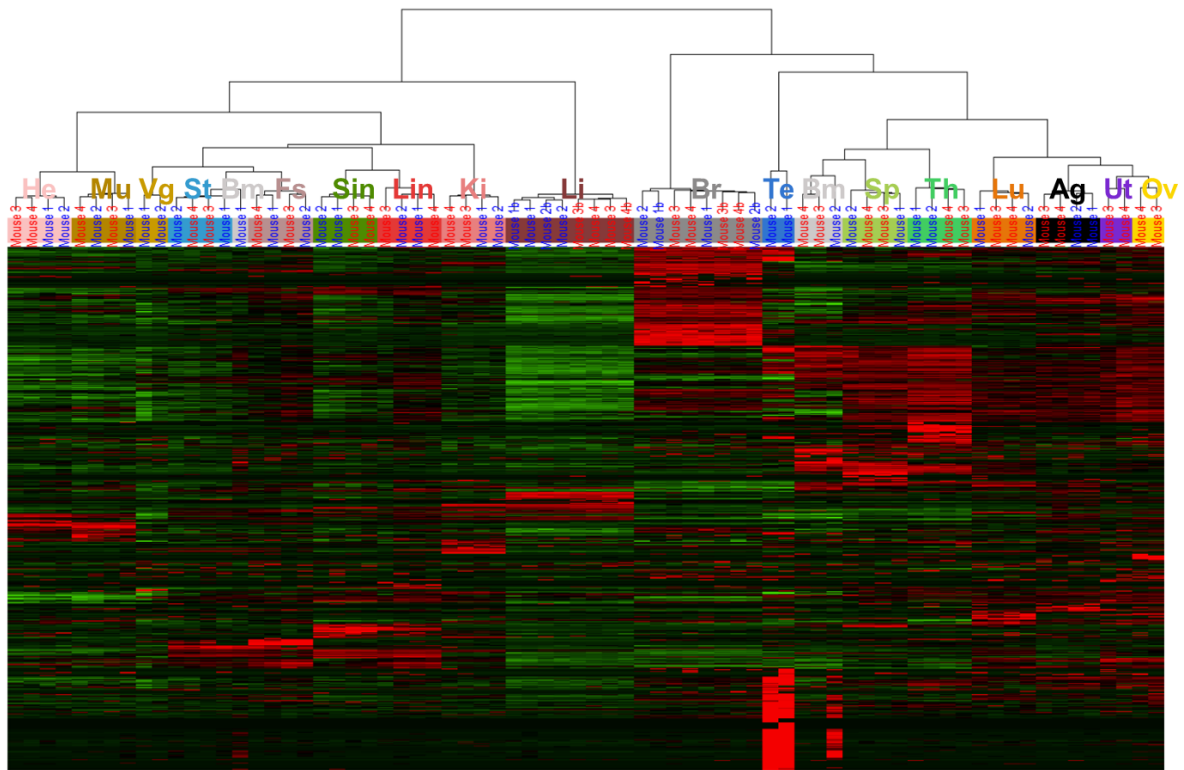

16 **Supplementary Figure S1. Hierarchical clustering analysis of all 72 samples.** Each  
 17 column indicated a sample, whereas each row indicated a gene. Each tissue symbol was  
 18 shown upon the color bar for each cluster. The mouse information where each sample came  
 19 from was also labeled upon the color bar. Mouse 1 and Mouse 2 were two male mice (in blue  
 20 text), while Mouse 3 and Mouse 4 were two female mice (in red text) as shown in Table 1.  
 21 One of the bone marrow sample was not clustered together with the other three bone marrow  
 22 samples, indicating that there may exist problems such as a mislabeling with this sample.

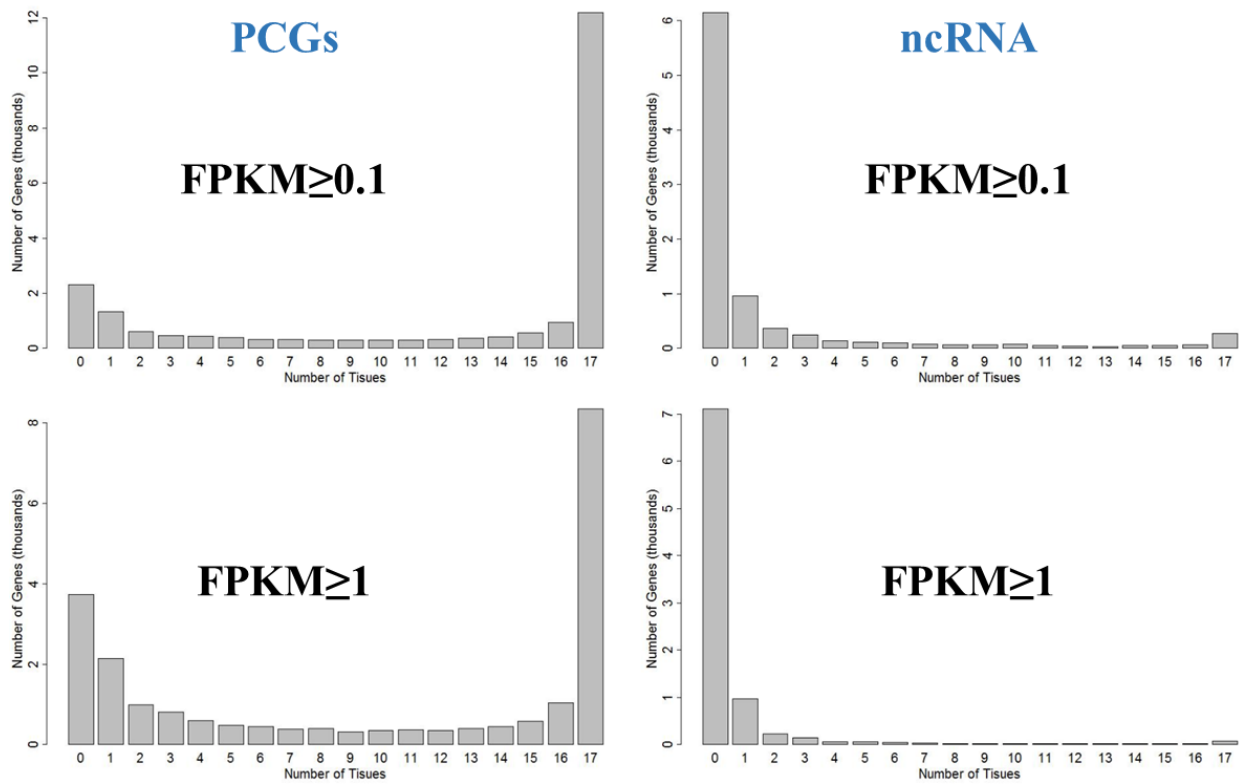

23 **Supplementary Figure S2. Number of expressed genes under two different thresholds**  
 24 **(0.1 and 1) given the number of tissues.** FPKMs were averaged over all replicate samples in  
 25 a given tissue. The gene expression distribution was complementary between PCGs (left  
 26 panel) and ncRNA (right panel).

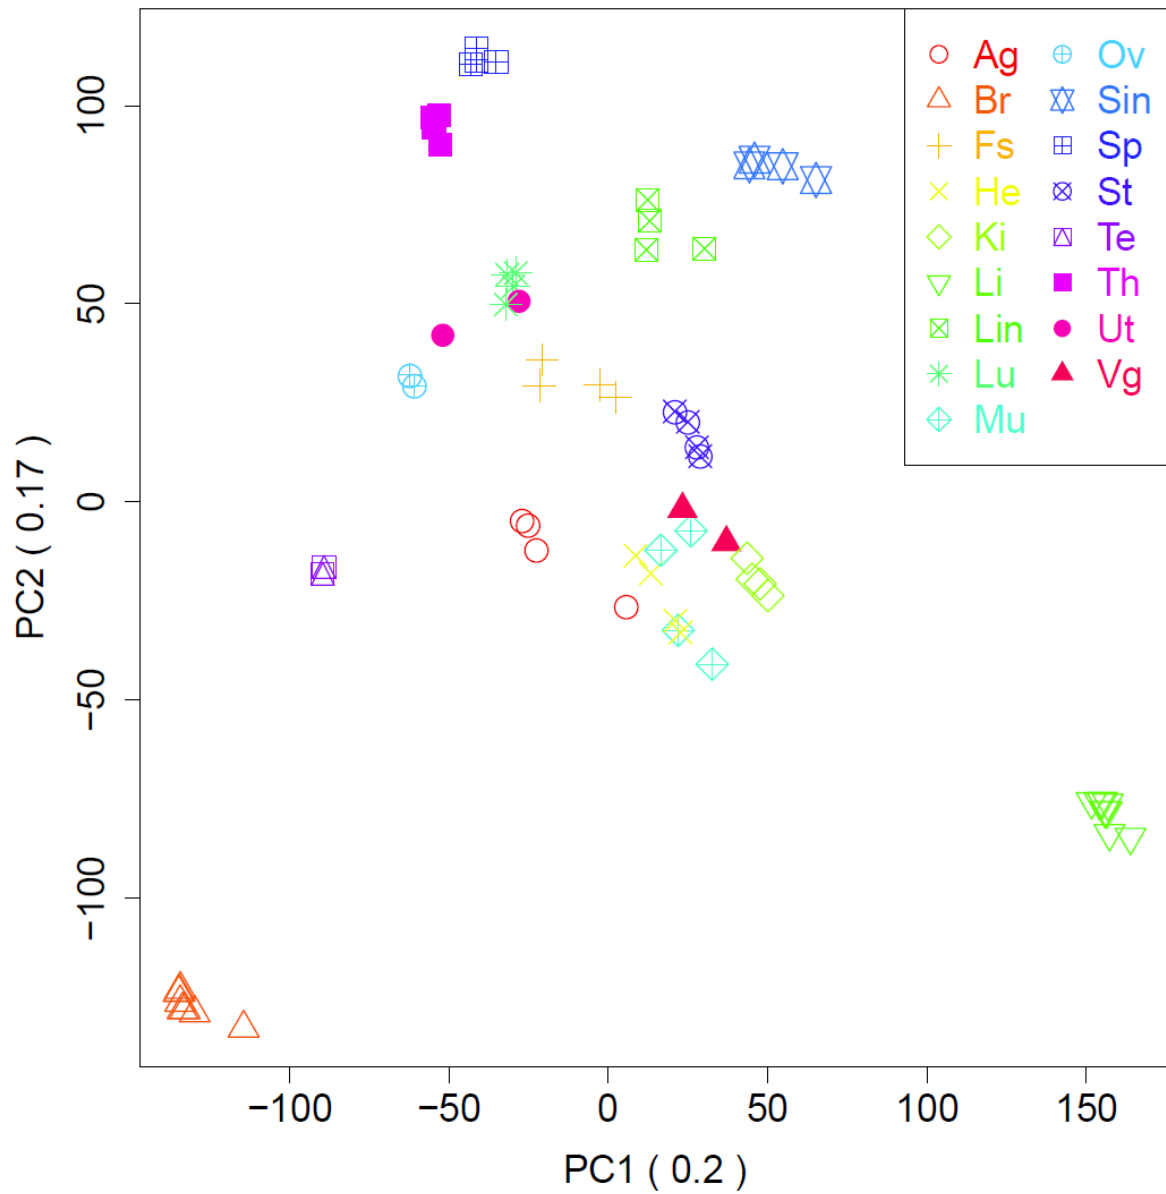

27 **Supplementary Figure S3. Principal component analysis of the expression profiles of the**  
 28 **68 samples.** Biological replicates from the same tissue were clustered together.

| PCGs  | He   | Mu   | Vg  | St   | Fs   | Ki   | Sin  | Lin  | Li   | Br   | Te   | Sp   | Th   | Lu   | Ag   | Ut   | Ov   |
|-------|------|------|-----|------|------|------|------|------|------|------|------|------|------|------|------|------|------|
| He    | 0    | 674  | 585 | 2432 | 3716 | 2899 | 3604 | 3763 | 1763 | 5270 | 5496 | 5989 | 6543 | 5794 | 5103 | 1495 | 4642 |
| Mu    | 657  | 0    | 513 | 2454 | 3887 | 2963 | 3619 | 3930 | 1698 | 5242 | 5640 | 5759 | 6111 | 5909 | 5169 | 1649 | 4936 |
| Vg    | 821  | 872  | 0   | 831  | 1281 | 1321 | 1465 | 1328 | 944  | 2697 | 0    | 2516 | 2102 | 2462 | 1984 | 0    | 0    |
| St    | 1531 | 1493 | 184 | 0    | 1027 | 2116 | 1821 | 1155 | 1294 | 4639 | 5125 | 4772 | 5433 | 4106 | 3877 | 862  | 3725 |
| Fs    | 1024 | 1084 | 136 | 3    | 0    | 1588 | 1440 | 738  | 1111 | 3369 | 4303 | 2885 | 3775 | 2252 | 1833 | 124  | 1593 |
| Ki    | 1217 | 1229 | 324 | 1476 | 2518 | 0    | 2201 | 2342 | 926  | 4111 | 4630 | 4340 | 5027 | 3940 | 2876 | 957  | 3091 |
| Sin   | 2091 | 1996 | 413 | 1274 | 2904 | 2436 | 0    | 1079 | 1267 | 4834 | 5007 | 4391 | 5101 | 4407 | 4104 | 979  | 3674 |
| Lin   | 1291 | 1261 | 175 | 516  | 1044 | 1737 | 821  | 0    | 1151 | 3874 | 4468 | 2967 | 4026 | 2826 | 2405 | 305  | 2101 |
| Li    | 3269 | 3037 | 980 | 3697 | 6045 | 4271 | 4370 | 5607 | 0    | 6826 | 6254 | 7410 | 7533 | 7601 | 7421 | 1931 | 5470 |
| Br    | 1794 | 1695 | 661 | 2268 | 2999 | 2728 | 3042 | 3135 | 1844 | 0    | 4144 | 3916 | 4395 | 3899 | 3124 | 1003 | 2404 |
| Te    | 1786 | 1870 | 0   | 2150 | 3128 | 2416 | 2499 | 3028 | 1595 | 2967 | 0    | 3177 | 2775 | 3439 | 3161 | 0    | 0    |
| Sp    | 1518 | 1572 | 443 | 1847 | 2442 | 2358 | 1981 | 2211 | 1433 | 3691 | 3820 | 0    | 1264 | 2638 | 2486 | 522  | 1542 |
| Th    | 1967 | 1851 | 559 | 2185 | 2860 | 2730 | 2200 | 2599 | 1637 | 3739 | 3634 | 1664 | 0    | 3216 | 2922 | 636  | 1628 |
| Lu    | 994  | 1173 | 247 | 1118 | 1310 | 1686 | 1802 | 1517 | 1186 | 3125 | 4074 | 1993 | 2800 | 0    | 1625 | 259  | 1054 |
| Ag    | 890  | 981  | 329 | 1293 | 1664 | 1456 | 1935 | 1710 | 1065 | 3056 | 3774 | 2396 | 2999 | 2417 | 0    | 260  | 888  |
| Ut    | 305  | 412  | 0   | 311  | 189  | 606  | 578  | 266  | 508  | 1123 | 0    | 633  | 473  | 433  | 264  | 0    | 0    |
| Ov    | 470  | 636  | 0   | 527  | 593  | 792  | 915  | 657  | 646  | 1467 | 0    | 977  | 912  | 705  | 354  | 0    | 0    |
| ncRNA | He   | Mu   | Vg  | St   | Fs   | Ki   | Sin  | Lin  | Li   | Br   | Te   | Sp   | Th   | Lu   | Ag   | Ut   | Ov   |
| He    | 0    | 25   | 11  | 25   | 43   | 64   | 39   | 51   | 35   | 141  | 276  | 131  | 181  | 111  | 95   | 14   | 72   |
| Mu    | 20   | 0    | 7   | 22   | 37   | 60   | 39   | 47   | 37   | 138  | 289  | 136  | 181  | 110  | 94   | 18   | 75   |
| Vg    | 28   | 30   | 0   | 9    | 20   | 36   | 22   | 19   | 27   | 109  | 1    | 74   | 99   | 80   | 64   | 0    | 0    |
| St    | 51   | 54   | 4   | 0    | 17   | 56   | 28   | 27   | 26   | 146  | 292  | 140  | 197  | 112  | 101  | 15   | 83   |
| Fs    | 39   | 46   | 5   | 0    | 0    | 48   | 19   | 15   | 24   | 119  | 294  | 90   | 143  | 69   | 61   | 3    | 40   |
| Ki    | 45   | 46   | 4   | 24   | 41   | 0    | 31   | 45   | 22   | 130  | 279  | 121  | 172  | 99   | 78   | 12   | 58   |
| Sin   | 54   | 64   | 6   | 20   | 48   | 65   | 0    | 25   | 23   | 155  | 278  | 127  | 193  | 115  | 124  | 19   | 84   |
| Lin   | 39   | 49   | 5   | 8    | 13   | 49   | 11   | 0    | 24   | 121  | 281  | 89   | 139  | 65   | 68   | 2    | 28   |
| Li    | 78   | 71   | 19  | 46   | 75   | 82   | 54   | 94   | 0    | 193  | 304  | 187  | 227  | 167  | 164  | 37   | 109  |
| Br    | 51   | 57   | 16  | 40   | 44   | 60   | 47   | 65   | 36   | 0    | 294  | 111  | 144  | 102  | 74   | 19   | 55   |
| Te    | 32   | 44   | 0   | 25   | 37   | 46   | 29   | 46   | 27   | 97   | 0    | 87   | 95   | 77   | 66   | 0    | 0    |
| Sp    | 41   | 53   | 9   | 26   | 31   | 56   | 23   | 40   | 26   | 115  | 259  | 0    | 56   | 71   | 63   | 5    | 29   |
| Th    | 46   | 60   | 10  | 33   | 34   | 59   | 30   | 50   | 27   | 113  | 263  | 40   | 0    | 84   | 76   | 10   | 27   |
| Lu    | 33   | 50   | 6   | 17   | 18   | 44   | 23   | 28   | 24   | 106  | 270  | 54   | 104  | 0    | 46   | 3    | 23   |
| Ag    | 30   | 42   | 6   | 20   | 19   | 44   | 28   | 32   | 27   | 106  | 268  | 71   | 111  | 49   | 0    | 3    | 19   |
| Ut    | 18   | 19   | 0   | 7    | 4    | 24   | 11   | 6    | 21   | 68   | 1    | 30   | 46   | 19   | 15   | 0    | 0    |
| Ov    | 21   | 33   | 0   | 11   | 6    | 30   | 19   | 19   | 21   | 70   | 1    | 36   | 43   | 20   | 13   | 0    | 0    |

29

30 **Supplementary Figure S4. Pairwise DEGs across all samples.** Upper panel: protein-coding  
31 genes (PCGs); lower panel: ncRNA genes. For each tissue in each column, the figures  
32 indicated the numbers of down-regulated genes comparing this tissue to the other tissues. For  
33 each tissue in each row, the figures indicated the numbers of up-regulated genes comparing  
34 this tissue to the other tissues. The tissues are in the same order as in Figure 1C.

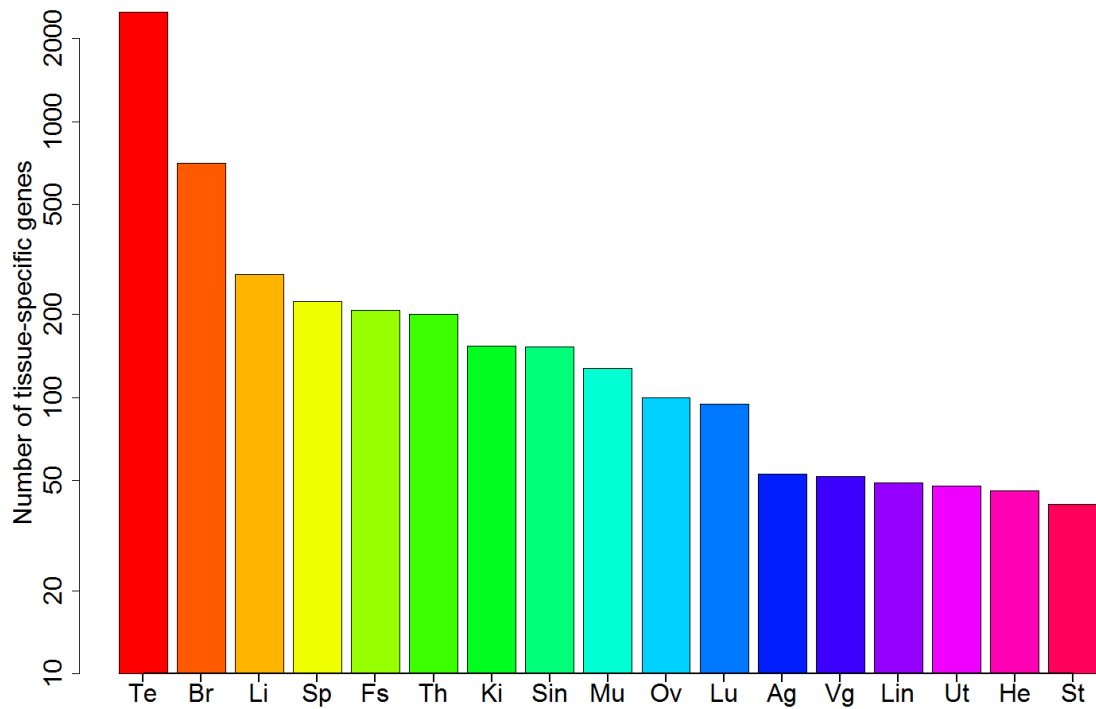

35 **Supplementary Figure S5. Number of tissue-specific genes.** Testis harbored the most  
 36 tissue-specific genes (2,496), closely followed by brain (708) and liver (280). The numbers of  
 37 tissue-specific genes identified in the other ten tissues ranged from 41 to 223.

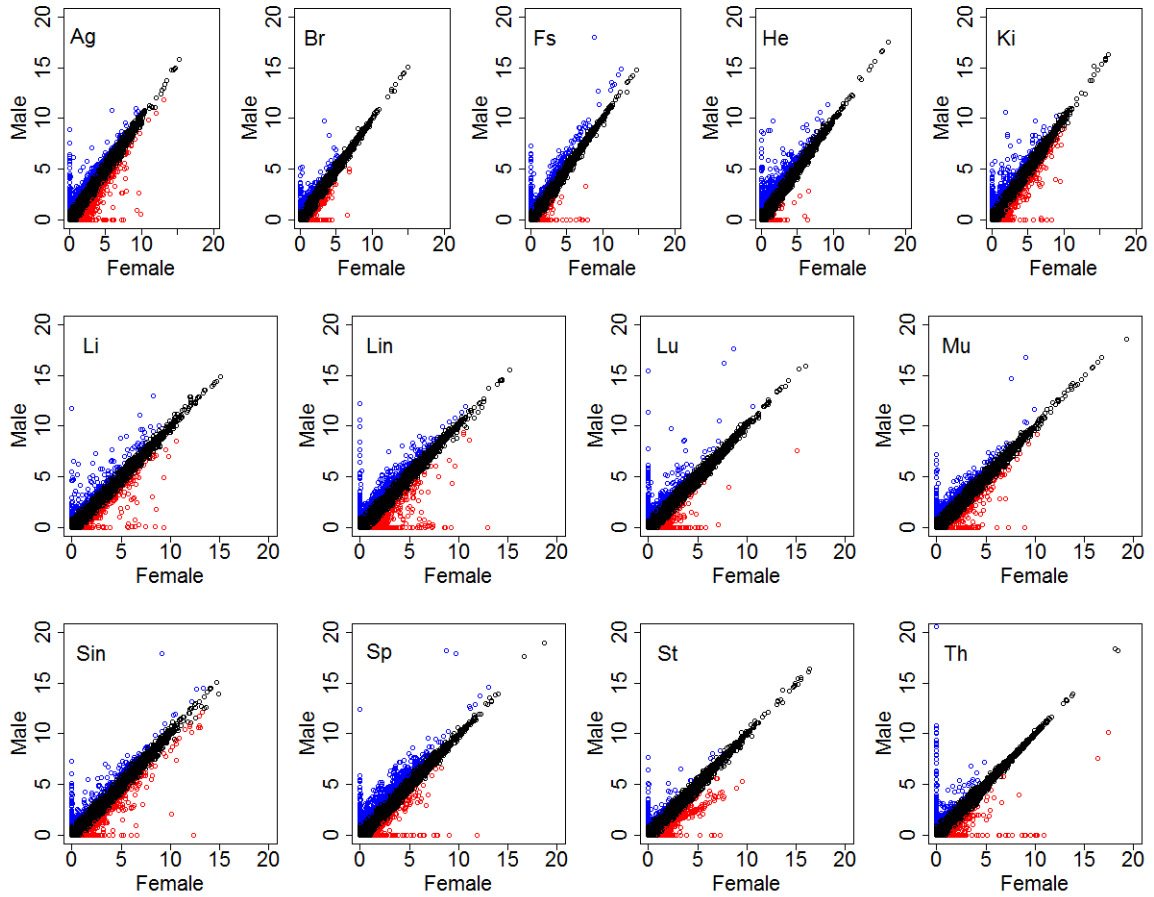

38 **Supplementary Figure S6. Sex differences of rat transcriptomic profiles.** Each scatter  
 39 plot indicates the gene-expression level (expressed as log<sub>2</sub>FPKM) of male (y axis) against  
 40 female (x axis) mouse for a given tissue among the thirteen non-sexual tissues. Male and  
 41 female dominated genes are highlighted in blue and red, respectively.

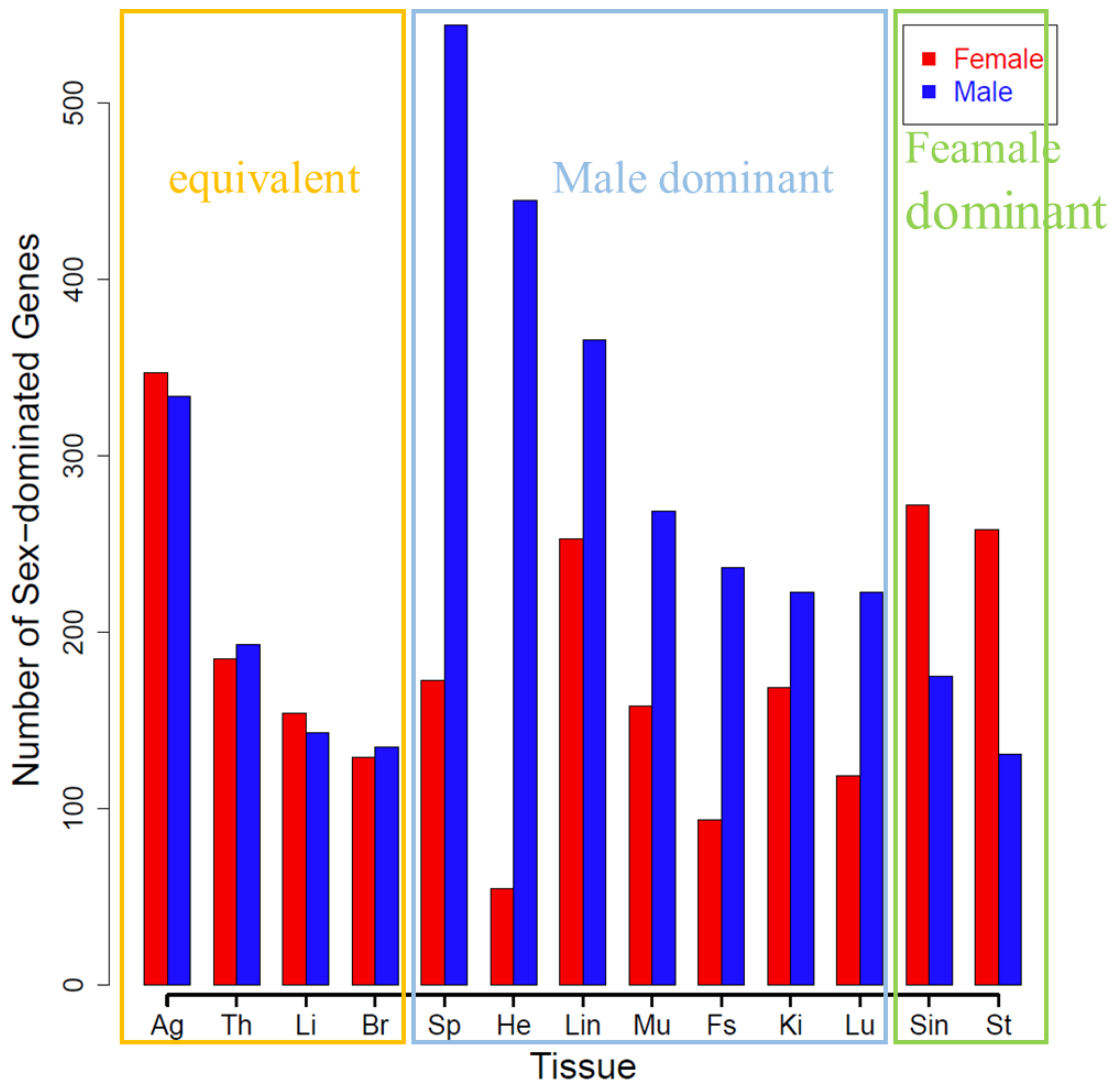

42 **Supplementary Figure S7. Number of sex-dominated genes across all non-sexual tissues.**

43 Spleen, heart, large intestine, muscle, forestomach, kidney and lung expressed more  
 44 male-dominated genes, whereas small intestine and stomach expressed more  
 45 female-dominated genes.

46



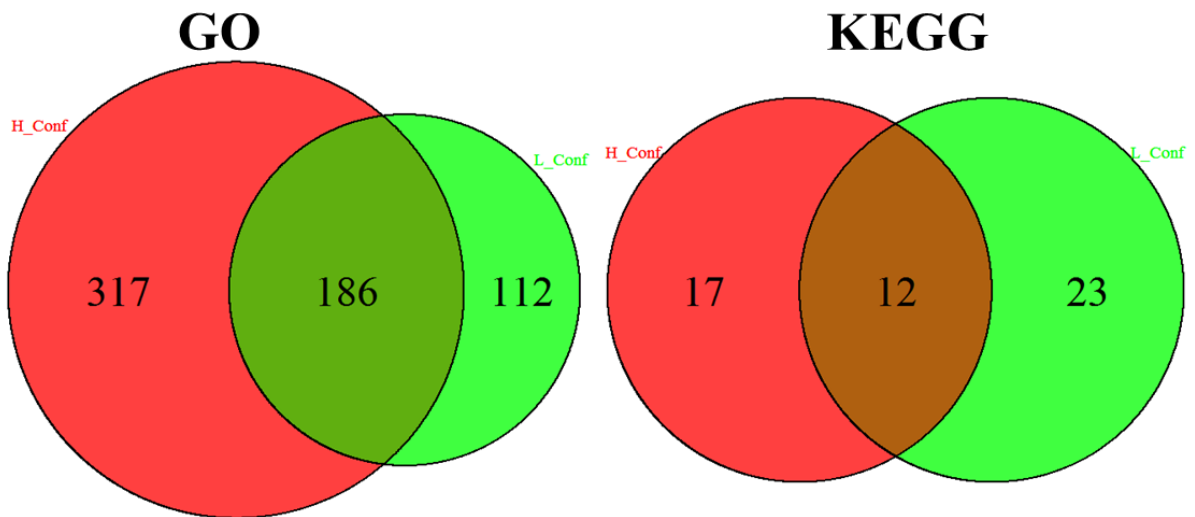

47 **Supplementary Figure S8. Number of GO terms and KEGG pathways significantly**  
 48 **enriched with the 4,781 house-keeping genes by groups.** Red: number of GO terms or  
 49 KEGG pathways by genes with high confidence; Green: number of GO terms or KEGG  
 50 pathways genes with relatively low confidence. Left panel: GO terms, right panel: KEGG  
 51 pathways.

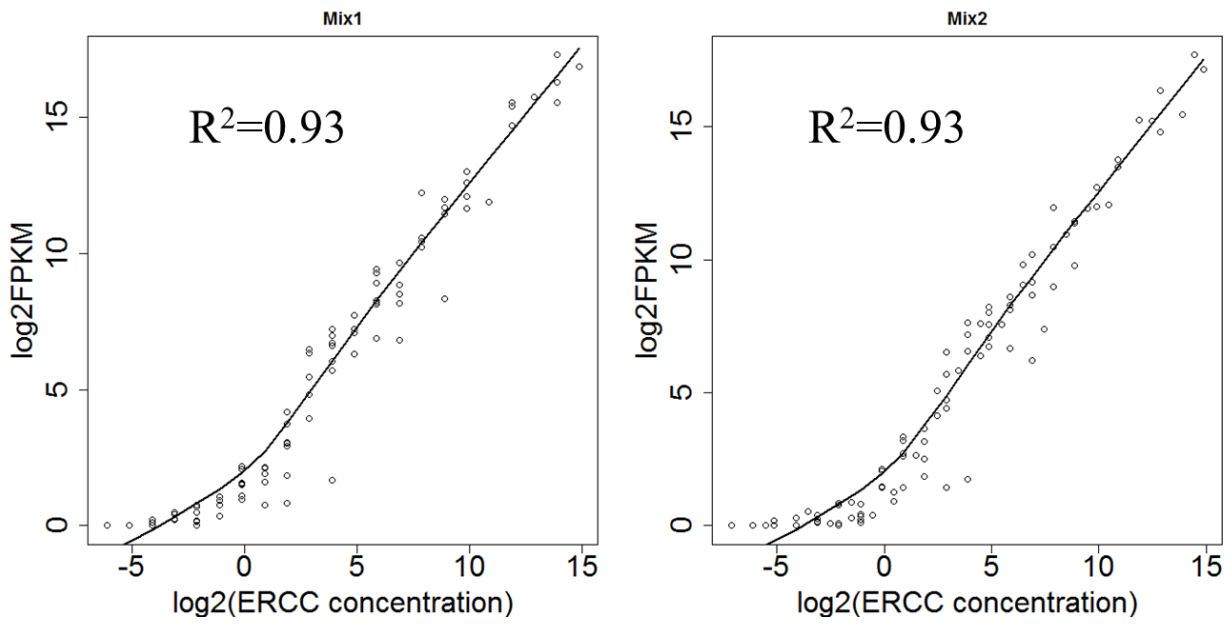

52 **Supplementary Figure S9. High correlation found between the calculated ERCC levels**  
53 **(y axis, log2FPKM) and the theoretical values (x axis, log2[ERCC concentration]). Left**  
54 **panel: Mix 1, right panel: Mix 2. The calculated values agreed well with the theoretical ones**  
55 **( $R^2=0.93$ ).**

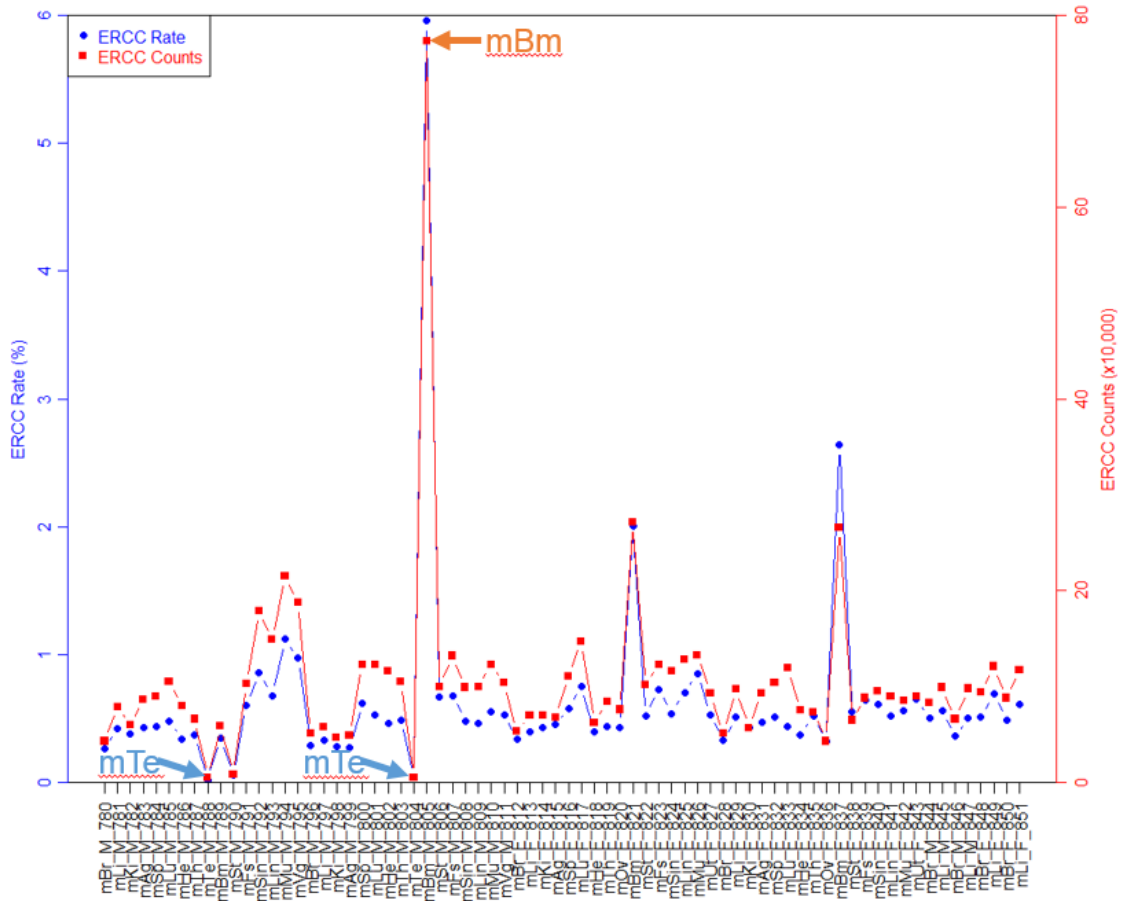

56 **Supplementary Figure S10. ERCC mapping ration and counts.** Left y axis: ERCC rate  
 57 (the blue line); Right y axis: ERCC counts (the red line).

58 **Supplementary Table S1. Isolation of total RNA.**

| Order_RNA | ProcessingOrder_RNA_Seq | UniqueSampeID | Con(ng/ul) | 260/280 | Yield (ug) | RIN | For_RNA-Seq | ERCC_Mix | Pool   |
|-----------|-------------------------|---------------|------------|---------|------------|-----|-------------|----------|--------|
| 1         | 1                       | mBr_M_6w_1    | 712.6      | 2.12    | 35.6       | 8.2 | YES         | Mix1     | Pool_1 |
| 3         | 2                       | mLi_M_6w_1    | 2274.1     | 2.06    | 113.7      | 8.6 | YES         | Mix1     | Pool_1 |
| 5         | 3                       | mKi_M_6w_1    | 1250.5     | 2.11    | 62.5       | 8.1 | YES         | Mix1     | Pool_1 |
| 7         | 4                       | mAg_M_6w_1    | 104.6      | 2.14    | 5.2        | 8.3 | YES         | Mix1     | Pool_1 |
| 8         | 5                       | mSp_M_6w_1    | 784.4      | 2.11    | 39.2       | 9.4 | YES         | Mix1     | Pool_1 |
| 9         | 6                       | mLu_M_6w_1    | 123.3      | 2.09    | 6.2        | 8.4 | YES         | Mix1     | Pool_1 |
| 10        | 7                       | mHe_M_6w_1    | 523.3      | 2.14    | 26.2       | 7.9 | YES         | Mix1     | Pool_1 |
| 11        | 8                       | mTh_M_6w_1    | 1081.1     | 2.12    | 54.1       | 9.8 | YES         | Mix1     | Pool_1 |
| 12        | 9                       | mTe_M_6w_1    | 711.0      | 2.14    | 35.5       | 9.1 | YES         | Mix1     | Pool_1 |
| 14        | 10                      | mBm_M_6w_1    | 447.7      | 2.05    | 22.4       | 7.2 | YES         | Mix1     | Pool_1 |
| 15        | 11                      | mSt_M_6w_1    | 876.2      | 2.1     | 43.8       | 8.6 | YES         | Mix1     | Pool_1 |
| 16        | 12                      | mFs_M_6w_1    | 428.5      | 2.06    | 21.4       | 8.9 | YES         | Mix1     | Pool_1 |
| 17        | 13                      | mSin_M_6w_1   | 2077.3     | 2.08    | 103.9      | 8.5 | YES         | Mix2     | Pool_1 |
| 18        | 14                      | mLin_M_6w_1   | 477.2      | 2.04    | 23.9       | 9.2 | YES         | Mix2     | Pool_1 |
| 19        | 15                      | mMu_M_6w_1    | 70.6       | 2.14    | 3.5        | 7.5 | YES         | Mix2     | Pool_1 |
| 20        | 16                      | mVg_M_6w_1    | 998.3      | 2.09    | 49.9       | 4.9 | YES         | Mix2     | Pool_1 |
| 21        | 17                      | mBr_M_6w_2    | 772.6      | 2.14    | 38.6       | 8.7 | YES         | Mix2     | Pool_1 |
| 23        | 18                      | mLi_M_6w_2    | 2032.6     | 2.08    | 101.6      | 9.1 | YES         | Mix2     | Pool_1 |
| 25        | 19                      | mKi_M_6w_2    | 693.7      | 2.16    | 34.7       | 8.2 | YES         | Mix2     | Pool_2 |
| 27        | 20                      | mAg_M_6w_2    | 127.7      | 2.15    | 6.4        | 9   | YES         | Mix2     | Pool_2 |
| 28        | 21                      | mSp_M_6w_2    | 889.1      | 2.11    | 44.5       | 9.6 | YES         | Mix2     | Pool_2 |
| 29        | 22                      | mLu_M_6w_2    | 159.2      | 2.13    | 8.0        | 8.5 | YES         | Mix2     | Pool_2 |
| 30        | 23                      | mHe_M_6w_2    | 176.6      | 2.14    | 8.8        | 8.9 | YES         | Mix2     | Pool_2 |
| 31        | 24                      | mTh_M_6w_2    | 768.0      | 2.12    | 38.4       | 9.9 | YES         | Mix2     | Pool_2 |
| 32        | 25                      | mTe_M_6w_2    | 814.0      | 2.1     | 40.7       | 9.5 | YES         | Mix1     | Pool_2 |
| 34        | 26                      | mBm_M_6w_2    | 426.8      | 2.06    | 21.3       | 5.3 | YES         | Mix1     | Pool_2 |
| 35        | 27                      | mSt_M_6w_2    | 664.4      | 2.13    | 33.2       | 8.7 | YES         | Mix1     | Pool_2 |
| 36        | 28                      | mFs_M_6w_2    | 262.2      | 2.09    | 13.1       | 9.1 | YES         | Mix1     | Pool_2 |
| 37        | 29                      | mSin_M_6w_2   | 1613.1     | 2.1     | 80.7       | 9.7 | YES         | Mix1     | Pool_2 |
| 38        | 30                      | mLin_M_6w_2   | 269.3      | 2.11    | 13.5       | 9.3 | YES         | Mix1     | Pool_2 |
| 39        | 31                      | mMu_M_6w_2    | 308.3      | 2.1     | 15.4       | 8.7 | YES         | Mix1     | Pool_2 |
| 40        | 32                      | mVg_M_6w_2    | 638.1      | 2.1     | 31.9       | 7   | YES         | Mix1     | Pool_2 |
| 41        | 33                      | mBr_F_6w_3    | 392.3      | 2.07    | 19.6       | 8.7 | YES         | Mix1     | Pool_2 |
| 43        | 34                      | mLi_F_6w_3    | 2273.8     | 2.08    | 113.7      | 8.9 | YES         | Mix1     | Pool_2 |
| 45        | 35                      | mKi_F_6w_3    | 652.8      | 2.14    | 32.6       | 8.6 | YES         | Mix1     | Pool_2 |
| 47        | 36                      | mAg_F_6w_3    | 183.2      | 2.1     | 9.2        | 9.4 | YES         | Mix1     | Pool_2 |
| 48        | 37                      | mSp_F_6w_3    | 718.0      | 2.13    | 35.9       | 9.2 | YES         | Mix2     | Pool_3 |
| 49        | 38                      | mLu_F_6w_3    | 102.7      | 1.85    | 5.1        | 8.9 | YES         | Mix2     | Pool_3 |
| 50        | 39                      | mHe_F_6w_3    | 121.7      | 2.1     | 6.1        | 9.2 | YES         | Mix2     | Pool_3 |
| 51        | 40                      | mTh_F_6w_3    | 743.0      | 2.13    | 37.1       | 9.9 | YES         | Mix2     | Pool_3 |

|    |        |             |         |      |         |     |     |      |        |
|----|--------|-------------|---------|------|---------|-----|-----|------|--------|
| 52 | 41     | mOv_F_6w_3  | 296.7   | 2.09 | 14.8    | 9.8 | YES | Mix2 | Pool_3 |
| 53 | 42     | mBm_F_6w_3  | 528.9   | 2.14 | 26.4    | 7.2 | YES | Mix2 | Pool_3 |
| 54 | 43     | mSt_F_6w_3  | 319.6   | 2.08 | 16.0    | 9.1 | YES | Mix2 | Pool_3 |
| 55 | 44     | mFs_F_6w_3  | 146.4   | 2.09 | 7.3     | 9.5 | YES | Mix2 | Pool_3 |
| 56 | 45     | mSin_F_6w_3 | 771.9   | 2.14 | 38.6    | NA  | YES | Mix2 | Pool_3 |
| 57 | 46     | mLin_F_6w_3 | 597.7   | 2.15 | 29.9    | NA  | YES | Mix2 | Pool_3 |
| 58 | 47     | mMu_F_6w_3  | 43.2    | 2.04 | 2.2     | 8.2 | YES | Mix2 | Pool_3 |
| 59 | 48     | mUt_F_6w_3  | 456.6   | 2.04 | 22.8    | 10  | YES | Mix2 | Pool_3 |
| 60 | 49     | mBr_F_6w_4  | 525.7   | 2.17 | 26.3    | 8.5 | YES | Mix1 | Pool_3 |
| 62 | 50     | mLi_F_6w_4  | 2161.4  | 2.08 | 108.1   | 8.7 | YES | Mix1 | Pool_3 |
| 64 | 51     | mKi_F_6w_4  | 779.9   | 2.15 | 39.0    | 8.5 | YES | Mix1 | Pool_3 |
| 66 | 52     | mAg_F_6w_4  | 201.2   | 2.11 | 10.1    | 9.2 | YES | Mix1 | Pool_3 |
| 67 | 53     | mSp_F_6w_4  | 466.4   | 2.04 | 23.3    | 9.6 | YES | Mix1 | Pool_3 |
| 68 | 54     | mLu_F_6w_4  | 106.2   | 2.1  | 5.3     | 8.7 | YES | Mix1 | Pool_3 |
| 69 | 55     | mHe_F_6w_4  | 155.6   | 2.1  | 7.8     | 8.7 | YES | Mix1 | Pool_4 |
| 70 | 56     | mTh_F_6w_4  | 862.7   | 2.15 | 43.1    | 10  | YES | Mix1 | Pool_4 |
| 71 | 57     | mOv_F_6w_4  | 326.9   | 2.09 | 16.3    | 9.9 | YES | Mix1 | Pool_4 |
| 72 | 58     | mBm_F_6w_4  | 559.8   | 2.16 | 28.0    | 6.2 | YES | Mix1 | Pool_4 |
| 73 | 59     | mSt_F_6w_4  | 1259.6  | 2.12 | 63.0    | 9.1 | YES | Mix1 | Pool_4 |
| 74 | 60     | mFs_F_6w_4  | 290.5   | 2.08 | 14.5    | 9.2 | YES | Mix1 | Pool_4 |
| 75 | 61     | mSin_F_6w_4 | 681.8   | 2.15 | 34.1    | 8.8 | YES | Mix2 | Pool_4 |
| 76 | 62     | mLin_F_6w_4 | 474.5   | 2.04 | 23.7    | 9.4 | YES | Mix2 | Pool_4 |
| 77 | 63     | mMu_F_6w_4  | 192.3   | 2.1  | 9.6     | 8.6 | YES | Mix2 | Pool_4 |
| 78 | 64     | mUt_F_6w_4  | 220.0   | 2.08 | 11.0    | 9.1 | YES | Mix2 | Pool_4 |
| 2  | 65     | mBr_M_6w_1b | 1046.6  | 2.12 | 52.3    | 7.9 | YES | Mix2 | Pool_4 |
| 4  | 66     | mLi_M_6w_1b | 1637.3  | 2.1  | 81.9    | 8.2 | YES | Mix2 | Pool_4 |
| 22 | 67     | mBr_M_6w_2b | 1000.3  | 2.12 | 50.0    | 8.8 | YES | Mix2 | Pool_4 |
| 24 | 68     | mLi_M_6w_2b | 1450.9  | 2.1  | 72.5    | 8.9 | YES | Mix2 | Pool_4 |
| 42 | 69     | mBr_F_6w_3b | 656.3   | 2.14 | 32.8    | 8.8 | YES | Mix2 | Pool_4 |
| 44 | 70     | mLi_F_6w_3b | 1662.4  | 2.1  | 83.1    | 8.9 | YES | Mix2 | Pool_4 |
| 61 | 71     | mBr_F_6w_4b | 550.3   | 2.16 | 27.5    | 8.6 | YES | Mix2 | Pool_4 |
| 63 | 72     | mLi_F_6w_4b | 1677.2  | 2.11 | 83.9    | 8.9 | YES | Mix2 | Pool_4 |
| 6  | Ignore | mKi_M_6w_1b | 1008.46 | 2.11 | 50.423  | 7.9 | NO  |      |        |
| 13 | Ignore | mTe_M_6w_1b | 820.83  | 2.14 | 41.0415 | 8.5 | NO  |      |        |
| 26 | Ignore | mKi_M_6w_2b | 427.54  | 2.09 | 21.377  | 8.6 | NO  |      |        |
| 33 | Ignore | mTe_M_6w_2b | 622.5   | 2.09 | 31.125  | 9.3 | NO  |      |        |
| 46 | Ignore | mKi_F_6w_3b | 669.15  | 2.12 | 33.4575 | 8.7 | NO  |      |        |
| 65 | Ignore | mKi_F_6w_4b | 406.41  | 2.07 | 20.3205 | 8.9 | NO  |      |        |

59 The “UniqueSampleID” column was used for naming raw fastq data files. For each sample  
60 ID, for example, “mBr\_M\_6w\_1”, “mBr” stands for tissue (including 18 different types of  
61 tissues), “M” stands for sex (M for male and F for female), “6w” stands for age, “1” stands

62 for animal replicates (including two male and two female mice, numbered as 1,2,3,4), and “b”  
63 stands for RNA sample replicate which only occurred in brain, liver, kidney, and testis. It  
64 should be noted that each pool was loaded onto two lanes of a flow cell for sequencing.

**Supplementary Table S2. Read counts summary and mapping stats of all samples.**

| SampleID    | ReadCounts | ReadsAfterTrimming | ReadsRemoved | TrimmingRate (%) | OverallMappingRate (%) | ERCCReads | ERCCRate (%) |
|-------------|------------|--------------------|--------------|------------------|------------------------|-----------|--------------|
| mBr_M_6w_1  | 18525008   | 16666932           | 1858076      | 10.0             | 94.5                   | 42709     | 0.26         |
| mLi_M_6w_1  | 20896688   | 19027264           | 1869424      | 8.9              | 94.1                   | 79268     | 0.42         |
| mKi_M_6w_1  | 17537336   | 15892748           | 1644588      | 9.4              | 89.9                   | 60483     | 0.38         |
| mAg_M_6w_1  | 22064332   | 19877900           | 2186432      | 9.9              | 93.2                   | 85862     | 0.43         |
| mSp_M_6w_1  | 22572530   | 20299026           | 2273504      | 10.1             | 96.0                   | 89832     | 0.44         |
| mLu_M_6w_1  | 24525136   | 22171380           | 2353756      | 9.6              | 95.0                   | 105411    | 0.48         |
| mHe_M_6w_1  | 25844398   | 23539150           | 2305248      | 8.9              | 84.3                   | 80297     | 0.34         |
| mTh_M_6w_1  | 19361654   | 17509262           | 1852392      | 9.6              | 96.0                   | 65509     | 0.37         |
| mTe_M_6w_1  | 21161906   | 19059702           | 2102204      | 9.9              | 96.4                   | 4686      | 0.02         |
| mBm_M_6w_1* | 18575368   | 16732044           | 1843324      | 9.9              | 93.9                   | 59114     | 0.35         |
| mSt_M_6w_1  | 15190592   | 13692732           | 1497860      | 9.9              | 93.7                   | 8258      | 0.06         |
| mFs_M_6w_1  | 19038200   | 17144340           | 1893860      | 9.9              | 94.1                   | 102698    | 0.60         |
| mSin_M_6w_1 | 23035516   | 20816606           | 2218910      | 9.6              | 93.2                   | 178921    | 0.86         |
| mLin_M_6w_1 | 24050944   | 21725582           | 2325362      | 9.7              | 93.9                   | 148762    | 0.68         |
| mMu_M_6w_1  | 21158214   | 19114222           | 2043992      | 9.7              | 88.7                   | 214882    | 1.12         |
| mVg_M_6w_1  | 21091328   | 19307924           | 1783404      | 8.5              | 95.5                   | 188221    | 0.97         |
| mBr_M_6w_2  | 19571314   | 17606970           | 1964344      | 10.0             | 93.2                   | 50891     | 0.29         |
| mLi_M_6w_2  | 19258190   | 17498838           | 1759352      | 9.1              | 94.7                   | 57815     | 0.33         |
| mKi_M_6w_2  | 18584284   | 16727752           | 1856532      | 10.0             | 89.2                   | 47271     | 0.28         |
| mAg_M_6w_2  | 20322612   | 18152340           | 2170272      | 10.7             | 93.8                   | 49202     | 0.27         |
| mSp_M_6w_2  | 22575994   | 20071408           | 2504586      | 11.1             | 95.5                   | 123448    | 0.62         |
| mLu_M_6w_2  | 26140480   | 23398842           | 2741638      | 10.5             | 94.8                   | 123289    | 0.53         |
| mHe_M_6w_2  | 27726914   | 24968424           | 2758490      | 9.9              | 85.5                   | 115635    | 0.46         |
| mTh_M_6w_2  | 24032546   | 21531988           | 2500558      | 10.4             | 95.8                   | 105293    | 0.49         |
| mTe_M_6w_2  | 17177416   | 15367784           | 1809632      | 10.5             | 96.6                   | 5437      | 0.04         |
| mBm_M_6w_2* | 14727854   | 12954378           | 1773476      | 12.0             | 87.4                   | 772722    | 5.96         |
| mSt_M_6w_2  | 16939036   | 14983438           | 1955598      | 11.5             | 93.2                   | 100153    | 0.67         |

|             |          |          |         |      |      |        |      |
|-------------|----------|----------|---------|------|------|--------|------|
| mFs_M_6w_2  | 21871886 | 19367078 | 2504808 | 11.5 | 94.7 | 132166 | 0.68 |
| mSin_M_6w_2 | 23133664 | 20731946 | 2401718 | 10.4 | 93.8 | 98747  | 0.48 |
| mLin_M_6w_2 | 24336470 | 21756286 | 2580184 | 10.6 | 94.3 | 99534  | 0.46 |
| mMu_M_6w_2  | 24912298 | 22269556 | 2642742 | 10.6 | 91.0 | 122642 | 0.55 |
| mVg_M_6w_2  | 21489520 | 19497926 | 1991594 | 9.3  | 95.3 | 103866 | 0.53 |
| mBr_F_6w_3  | 17254978 | 15334488 | 1920490 | 11.1 | 93.8 | 52725  | 0.34 |
| mLi_F_6w_3  | 19512402 | 17621396 | 1891006 | 9.7  | 93.8 | 70065  | 0.40 |
| mKi_F_6w_3  | 17806624 | 16036380 | 1770244 | 9.9  | 89.4 | 69646  | 0.43 |
| mAg_F_6w_3  | 17500164 | 14982954 | 2517210 | 14.4 | 93.0 | 67665  | 0.45 |
| mSp_F_6w_3  | 21162944 | 19018126 | 2144818 | 10.1 | 95.7 | 110531 | 0.58 |
| mLu_F_6w_3  | 21681456 | 19519366 | 2162090 | 10.0 | 94.8 | 147120 | 0.75 |
| mHe_F_6w_3  | 17178324 | 15488782 | 1689542 | 9.8  | 82.9 | 61860  | 0.40 |
| mTh_F_6w_3  | 21241628 | 19089936 | 2151692 | 10.1 | 96.2 | 84076  | 0.44 |
| mOv_F_6w_3  | 19771088 | 17762660 | 2008428 | 10.2 | 95.7 | 75502  | 0.43 |
| mBm_F_6w_3* | 15088784 | 13471096 | 1617688 | 10.7 | 93.9 | 270805 | 2.01 |
| mSt_F_6w_3  | 21704066 | 19460376 | 2243690 | 10.3 | 93.2 | 101977 | 0.52 |
| mFs_F_6w_3  | 18922354 | 16884352 | 2038002 | 10.8 | 95.2 | 122625 | 0.73 |
| mSin_F_6w_3 | 23701666 | 21340548 | 2361118 | 10.0 | 94.6 | 115757 | 0.54 |
| mLin_F_6w_3 | 20223568 | 18334958 | 1888610 | 9.3  | 94.2 | 127844 | 0.70 |
| mMu_F_6w_3  | 17229904 | 15615182 | 1614722 | 9.4  | 90.0 | 132699 | 0.85 |
| mUt_F_6w_3  | 19656324 | 17676074 | 1980250 | 10.1 | 95.6 | 93205  | 0.53 |
| mBr_F_6w_4  | 17364056 | 15640986 | 1723070 | 9.9  | 93.9 | 51288  | 0.33 |
| mLi_F_6w_4  | 20961492 | 19033962 | 1927530 | 9.2  | 93.9 | 97358  | 0.51 |
| mKi_F_6w_4  | 14610436 | 13228868 | 1381568 | 9.5  | 89.2 | 57355  | 0.43 |
| mAg_F_6w_4  | 22178632 | 19875496 | 2303136 | 10.4 | 93.4 | 92875  | 0.47 |
| mSp_F_6w_4  | 22704312 | 20429870 | 2274442 | 10.0 | 95.5 | 104431 | 0.51 |
| mLu_F_6w_4  | 30394904 | 27361452 | 3033452 | 10.0 | 95.5 | 119353 | 0.44 |
| mHe_F_6w_4  | 22442576 | 19967770 | 2474806 | 11.0 | 84.7 | 74741  | 0.37 |
| mTh_F_6w_4  | 15835926 | 13960316 | 1875610 | 11.8 | 95.9 | 72853  | 0.52 |



|             |          |          |         |      |      |        |      |
|-------------|----------|----------|---------|------|------|--------|------|
| mOv_F_6w_4  | 15652612 | 13737262 | 1915350 | 12.2 | 95.8 | 43311  | 0.32 |
| mBm_F_6w_4* | 11501782 | 10044622 | 1457160 | 12.7 | 93.4 | 265612 | 2.64 |
| mSt_F_6w_4  | 13450798 | 11817084 | 1633714 | 12.1 | 93.1 | 64718  | 0.55 |
| mFs_F_6w_4  | 15771670 | 13805992 | 1965678 | 12.5 | 94.1 | 87938  | 0.64 |
| mSin_F_6w_4 | 17692576 | 15585984 | 2106592 | 11.9 | 94.2 | 95132  | 0.61 |
| mLin_F_6w_4 | 19658454 | 17304712 | 2353742 | 12.0 | 94.0 | 89988  | 0.52 |
| mMu_F_6w_4  | 17423318 | 15277286 | 2146032 | 12.3 | 89.6 | 84891  | 0.56 |
| mUt_F_6w_4  | 15952878 | 13972728 | 1980150 | 12.4 | 95.3 | 90466  | 0.65 |
| mBr_M_6w_1b | 18964948 | 16635036 | 2329912 | 12.3 | 93.3 | 83324  | 0.50 |
| mLi_M_6w_1b | 19852936 | 17688740 | 2164196 | 10.9 | 94.0 | 99311  | 0.56 |
| mBr_M_6w_2b | 21200474 | 18601370 | 2599104 | 12.3 | 94.3 | 66088  | 0.36 |
| mLi_M_6w_2b | 22397662 | 19716346 | 2681316 | 12.0 | 94.7 | 98445  | 0.50 |
| mBr_F_6w_3b | 20889464 | 18358194 | 2531270 | 12.1 | 93.3 | 94463  | 0.51 |
| mLi_F_6w_3b | 19807288 | 17628090 | 2179198 | 11.0 | 93.8 | 121069 | 0.69 |
| mBr_F_6w_4b | 20275116 | 17863378 | 2411738 | 11.9 | 93.6 | 87798  | 0.49 |
| mLi_F_6w_4b | 21432152 | 19046116 | 2386036 | 11.1 | 93.8 | 116927 | 0.61 |

66 \*The four bone marrow samples were removed when the analyses were conducted.

67 **Supplementary Table S3. Significantly (P value < 0.05) enriched GO terms based on**  
68 **tissue-specific genes across all 17 tissues.** Only top 10 terms of each tissue were listed. BP:  
69 biological process, CC: cellular component, MF: molecular function.

| Tissue | Category | Term                                          | Count | PValue      |
|--------|----------|-----------------------------------------------|-------|-------------|
| Ag     | BP       | GO:0006694~steroid biosynthetic process       | 8     | 3.01E-10    |
| Ag     | BP       | GO:0008202~steroid metabolic process          | 9     | 3.52E-09    |
| Ag     | BP       | GO:0055114~oxidation reduction                | 13    | 2.64E-08    |
| Ag     | BP       | GO:0007631~feeding behavior                   | 6     | 0.000000134 |
| Ag     | BP       | GO:0008610~lipid biosynthetic process         | 9     | 0.000000299 |
| Ag     | BP       | GO:0034754~cellular hormone metabolic process | 5     | 0.00000719  |
| Ag     | BP       | GO:0042446~hormone biosynthetic process       | 4     | 0.0000168   |
| Ag     | BP       | GO:0007610~behavior                           | 8     | 0.0000433   |
| Ag     | BP       | GO:0042756~drinking behavior                  | 3     | 0.0000569   |
| Ag     | BP       | GO:0042445~hormone metabolic process          | 5     | 0.0000636   |
| Br     | CC       | GO:0045202~synapse                            | 100   | 6.66E-62    |
| Br     | CC       | GO:0044456~synapse part                       | 77    | 1.62E-52    |
| Br     | CC       | GO:0043005~neuron projection                  | 77    | 3.14E-47    |
| Br     | BP       | GO:0019226~transmission of nerve impulse      | 65    | 1.35E-43    |
| Br     | BP       | GO:0007268~synaptic transmission              | 55    | 1.49E-38    |
| Br     | CC       | GO:0005886~plasma membrane                    | 237   | 7.61E-33    |
| Br     | BP       | GO:0007267~cell-cell signaling                | 61    | 1.82E-32    |
| Br     | CC       | GO:0030054~cell junction                      | 82    | 4.8E-30     |
| Br     | BP       | GO:0006836~neurotransmitter transport         | 33    | 1.47E-27    |
| Br     | CC       | GO:0045211~postsynaptic membrane              | 42    | 1.22E-26    |
| Fs     | BP       | GO:0030216~keratinocyte differentiation       | 15    | 4.32E-20    |
| Fs     | BP       | GO:0031424~keratinization                     | 13    | 9.23E-20    |
| Fs     | BP       | GO:0009913~epidermal cell differentiation     | 15    | 1.14E-19    |
| Fs     | BP       | GO:0008544~epidermis development              | 19    | 1.33E-19    |
| Fs     | BP       | GO:0007398~ectoderm development               | 19    | 4.23E-19    |

|           |    |                                                         |    |            |
|-----------|----|---------------------------------------------------------|----|------------|
| <b>Fs</b> | BP | GO:0030855~epithelial cell differentiation              | 17 | 8.83E-17   |
| <b>Fs</b> | CC | GO:0001533~cornified envelope                           | 10 | 7.25E-15   |
| <b>Fs</b> | CC | GO:0030057~desmosome                                    | 9  | 1.35E-12   |
| <b>Fs</b> | BP | GO:0060429~epithelium development                       | 17 | 2.31E-11   |
| <b>Fs</b> | MF | GO:0030414~peptidase inhibitor activity                 | 15 | 3.77E-11   |
| <b>He</b> | BP | GO:0007507~heart development                            | 11 | 4.89E-12   |
| <b>He</b> | CC | GO:0030016~myofibril                                    | 9  | 8.07E-12   |
| <b>He</b> | CC | GO:0043292~contractile fiber                            | 9  | 1.15E-11   |
| <b>He</b> | CC | GO:0030017~sarcomere                                    | 7  | 1.18E-08   |
| <b>He</b> | CC | GO:0044449~contractile fiber part                       | 7  | 1.83E-08   |
| <b>He</b> | BP | GO:0008016~regulation of heart contraction              | 6  | 3.41E-08   |
| <b>He</b> | BP | GO:0048738~cardiac muscle tissue development            | 6  | 6.68E-08   |
| <b>He</b> | BP | GO:0044057~regulation of system process                 | 8  | 7.24E-08   |
| <b>He</b> | BP | GO:0002026~regulation of the force of heart contraction | 4  | 0.00000176 |
| <b>He</b> | BP | GO:0008015~blood circulation                            | 6  | 0.00000191 |
| <b>Ki</b> | BP | GO:0006811~ion transport                                | 33 | 2.95E-19   |
| <b>Ki</b> | BP | GO:0055085~transmembrane transport                      | 26 | 7.04E-17   |
| <b>Ki</b> | MF | GO:0008509~anion transmembrane transporter activity     | 17 | 1.07E-15   |
| <b>Ki</b> | BP | GO:0006820~anion transport                              | 16 | 3.93E-15   |
| <b>Ki</b> | CC | GO:0045177~apical part of cell                          | 17 | 6.96E-15   |
| <b>Ki</b> | CC | GO:0016324~apical plasma membrane                       | 15 | 2.79E-14   |
| <b>Ki</b> | MF | GO:0015293~symporter activity                           | 14 | 1.16E-11   |
| <b>Ki</b> | BP | GO:0006812~cation transport                             | 21 | 7.26E-11   |
| <b>Ki</b> | MF | GO:0031402~sodium ion binding                           | 12 | 2.01E-10   |
| <b>Ki</b> | BP | GO:0006814~sodium ion transport                         | 12 | 4.5E-10    |
| <b>Li</b> | CC | GO:0005576~extracellular region                         | 94 | 8.53E-35   |
| <b>Li</b> | BP | GO:0009611~response to wounding                         | 41 | 1.8E-26    |
| <b>Li</b> | MF | GO:0020037~heme binding                                 | 30 | 2.88E-25   |
| <b>Li</b> | MF | GO:0046906~tetrapyrrole binding                         | 30 | 1.21E-24   |

|            |    |                                                     |    |           |
|------------|----|-----------------------------------------------------|----|-----------|
| <b>Li</b>  | CC | GO:0005615~extracellular space                      | 47 | 2.51E-24  |
| <b>Li</b>  | MF | GO:0016712~oxidoreductase activity                  | 20 | 4.93E-24  |
| <b>Li</b>  | BP | GO:0002526~acute inflammatory response              | 23 | 2.74E-23  |
| <b>Li</b>  | MF | GO:0009055~electron carrier activity                | 30 | 6.34E-21  |
| <b>Li</b>  | MF | GO:0004866~endopeptidase inhibitor activity         | 27 | 3.61E-20  |
| <b>Li</b>  | MF | GO:0005506~iron ion binding                         | 36 | 3.84E-20  |
| <b>Lin</b> | MF | GO:0005179~hormone activity                         | 4  | 0.000712  |
| <b>Lin</b> | MF | GO:0008509~anion transmembrane transporter activity | 4  | 0.00107   |
| <b>Lin</b> | BP | GO:0015698~inorganic anion transport                | 3  | 0.00472   |
| <b>Lin</b> | MF | GO:0031404~chloride ion binding                     | 3  | 0.00509   |
| <b>Lin</b> | MF | GO:0043168~anion binding                            | 3  | 0.00538   |
| <b>Lin</b> | BP | GO:0070085~glycosylation                            | 3  | 0.00565   |
| <b>Lin</b> | BP | GO:0043413~biopolymer glycosylation                 | 3  | 0.00565   |
| <b>Lin</b> | BP | GO:0006486~protein amino acid glycosylation         | 3  | 0.00565   |
| <b>Lin</b> | BP | GO:0009101~glycoprotein biosynthetic process        | 3  | 0.00919   |
| <b>Lin</b> | CC | GO:0005576~extracellular region                     | 9  | 0.0105    |
| <b>Lu</b>  | MF | GO:0030246~carbohydrate binding                     | 10 | 0.0000093 |
| <b>Lu</b>  | MF | GO:0005529~sugar binding                            | 7  | 0.0000308 |
| <b>Lu</b>  | CC | GO:0005576~extracellular region                     | 21 | 0.0000643 |
| <b>Lu</b>  | BP | GO:0007585~respiratory gaseous exchange             | 4  | 0.0000742 |
| <b>Lu</b>  | BP | GO:0030324~lung development                         | 5  | 0.000486  |
| <b>Lu</b>  | BP | GO:0030323~respiratory tube development             | 5  | 0.000519  |
| <b>Lu</b>  | BP | GO:0006022~aminoglycan metabolic process            | 4  | 0.00067   |
| <b>Lu</b>  | CC | GO:0005615~extracellular space                      | 10 | 0.000682  |
| <b>Lu</b>  | BP | GO:0060541~respiratory system development           | 5  | 0.000737  |
| <b>Lu</b>  | CC | GO:0044421~extracellular region part                | 12 | 0.001     |
| <b>Mu</b>  | CC | GO:0030017~sarcomere                                | 14 | 1.08E-16  |
| <b>Mu</b>  | CC | GO:0044449~contractile fiber part                   | 14 | 2.91E-16  |
| <b>Mu</b>  | CC | GO:0030016~myofibril                                | 14 | 6.27E-16  |

|            |    |                                                                 |    |            |
|------------|----|-----------------------------------------------------------------|----|------------|
| <b>Mu</b>  | CC | GO:0043292~contractile fiber                                    | 14 | 1.12E-15   |
| <b>Mu</b>  | CC | GO:0016529~sarcoplasmic reticulum                               | 9  | 4.9E-12    |
| <b>Mu</b>  | CC | GO:0016528~sarcoplasm                                           | 9  | 8.1E-12    |
| <b>Mu</b>  | BP | GO:0006006~glucose metabolic process                            | 12 | 8.68E-11   |
| <b>Mu</b>  | BP | GO:0005977~glycogen metabolic process                           | 8  | 2.21E-10   |
| <b>Mu</b>  | BP | GO:0044042~glucan metabolic process                             | 8  | 2.21E-10   |
| <b>Mu</b>  | BP | GO:0006073~cellular glucan metabolic process                    | 8  | 2.21E-10   |
| <b>Ov</b>  | BP | GO:0019953~sexual reproduction                                  | 10 | 0.00000213 |
| <b>Ov</b>  | BP | GO:0048608~reproductive structure development                   | 7  | 0.0000027  |
| <b>Ov</b>  | BP | GO:0009566~fertilization                                        | 6  | 0.00000284 |
| <b>Ov</b>  | BP | GO:0008406~gonad development                                    | 6  | 0.00000715 |
| <b>Ov</b>  | BP | GO:0045137~development of primary sexual characteristics        | 6  | 0.0000162  |
| <b>Ov</b>  | BP | GO:0008585~female gonad development                             | 5  | 0.0000207  |
| <b>Ov</b>  | CC | GO:0005576~extracellular region                                 | 17 | 0.0000272  |
| <b>Ov</b>  | BP | GO:0046545~development of primary female sexual characteristics | 5  | 0.0000277  |
| <b>Ov</b>  | BP | GO:0046660~female sex differentiation                           | 5  | 0.0000438  |
| <b>Ov</b>  | BP | GO:0007548~sex differentiation                                  | 6  | 0.0000475  |
| <b>Sin</b> | BP | GO:0006952~defense response                                     | 16 | 6.4E-09    |
| <b>Sin</b> | CC | GO:0005903~brush border                                         | 7  | 4.56E-08   |
| <b>Sin</b> | BP | GO:0042742~defense response to bacterium                        | 8  | 0.00000131 |
| <b>Sin</b> | BP | GO:0009617~response to bacterium                                | 9  | 0.00000137 |
| <b>Sin</b> | MF | GO:0008238~exopeptidase activity                                | 7  | 0.00000222 |
| <b>Sin</b> | MF | GO:0004177~aminopeptidase activity                              | 5  | 0.0000155  |
| <b>Sin</b> | CC | GO:0005576~extracellular region                                 | 24 | 0.0000514  |
| <b>Sin</b> | MF | GO:0008237~metallopeptidase activity                            | 8  | 0.0000727  |
| <b>Sin</b> | CC | GO:0005615~extracellular space                                  | 11 | 0.00073    |
| <b>Sin</b> | CC | GO:0042612~MHC class I protein complex                          | 4  | 0.00186    |
| <b>Sp</b>  | BP | GO:0006955~immune response                                      | 34 | 2.15E-22   |
| <b>Sp</b>  | BP | GO:0009611~response to wounding                                 | 22 | 4.64E-13   |

|           |    |                                                             |     |          |
|-----------|----|-------------------------------------------------------------|-----|----------|
| <b>Sp</b> | BP | GO:0050778~positive regulation of immune response           | 15  | 4.17E-12 |
| <b>Sp</b> | BP | GO:0006952~defense response                                 | 23  | 7.84E-12 |
| <b>Sp</b> | BP | GO:0002253~activation of immune response                    | 12  | 8.67E-11 |
| <b>Sp</b> | BP | GO:0002684~positive regulation of immune system process     | 16  | 1.02E-10 |
| <b>Sp</b> | BP | GO:0001775~cell activation                                  | 17  | 1.26E-10 |
| <b>Sp</b> | BP | GO:0048584~positive regulation of response to stimulus      | 15  | 2.9E-10  |
| <b>Sp</b> | BP | GO:0006954~inflammatory response                            | 15  | 3.51E-09 |
| <b>Sp</b> | BP | GO:0002252~immune effector process                          | 12  | 5.5E-09  |
| <b>St</b> | BP | GO:0006885~regulation of pH                                 | 3   | 0.00113  |
| <b>St</b> | MF | GO:0004190~aspartic-type endopeptidase activity             | 3   | 0.00116  |
| <b>St</b> | MF | GO:0070001~aspartic-type peptidase activity                 | 3   | 0.00116  |
| <b>St</b> | CC | GO:0005576~extracellular region                             | 12  | 0.00117  |
| <b>St</b> | BP | GO:0055067~monovalent inorganic cation homeostasis          | 3   | 0.0017   |
| <b>St</b> | BP | GO:0055080~cation homeostasis                               | 4   | 0.00311  |
| <b>St</b> | BP | GO:0010155~regulation of proton transport                   | 2   | 0.00324  |
| <b>St</b> | BP | GO:0006811~ion transport                                    | 6   | 0.00487  |
| <b>St</b> | BP | GO:0030001~metal ion transport                              | 5   | 0.00507  |
| <b>St</b> | MF | GO:0008900~hydrogen:potassium-exchanging ATPase activity    | 2   | 0.00563  |
| <b>Te</b> | BP | GO:0019953~sexual reproduction                              | 121 | 1.63E-70 |
| <b>Te</b> | BP | GO:0048232~male gamete generation                           | 100 | 1.76E-68 |
| <b>Te</b> | BP | GO:0007283~spermatogenesis                                  | 100 | 1.76E-68 |
| <b>Te</b> | BP | GO:0007276~gamete generation                                | 103 | 3.42E-59 |
| <b>Te</b> | BP | GO:0048609~reproductive process in a multicellular organism | 107 | 2.7E-53  |
| <b>Te</b> | BP | GO:0032504~multicellular organism reproduction              | 107 | 2.7E-53  |
| <b>Te</b> | CC | GO:0019861~flagellum                                        | 32  | 3.64E-28 |
| <b>Te</b> | CC | GO:0001669~acrosomal vesicle                                | 27  | 6.38E-25 |
| <b>Te</b> | BP | GO:0048610~reproductive cellular process                    | 46  | 6.74E-23 |
| <b>Te</b> | CC | GO:0005929~cilium                                           | 39  | 7.66E-21 |
| <b>Th</b> | BP | GO:0030217~T cell differentiation                           | 14  | 1.47E-17 |

|           |    |                                                      |    |            |
|-----------|----|------------------------------------------------------|----|------------|
| <b>Th</b> | BP | GO:0042110~T cell activation                         | 15 | 1.25E-16   |
| <b>Th</b> | BP | GO:0045321~leukocyte activation                      | 17 | 2.26E-15   |
| <b>Th</b> | BP | GO:0030098~lymphocyte differentiation                | 14 | 3.74E-15   |
| <b>Th</b> | BP | GO:0046649~lymphocyte activation                     | 16 | 6.4E-15    |
| <b>Th</b> | BP | GO:0001775~cell activation                           | 17 | 1.4E-14    |
| <b>Th</b> | BP | GO:0002521~leukocyte differentiation                 | 14 | 6.8E-14    |
| <b>Th</b> | BP | GO:0002520~immune system development                 | 15 | 5.47E-11   |
| <b>Th</b> | BP | GO:0030097~hemopoiesis                               | 14 | 9.85E-11   |
| <b>Th</b> | BP | GO:0048534~hemopoietic or lymphoid organ development | 14 | 3.99E-10   |
| <b>Ut</b> | BP | GO:0030326~embryonic limb morphogenesis              | 6  | 0.00000245 |
| <b>Ut</b> | BP | GO:0035113~embryonic appendage morphogenesis         | 6  | 0.00000245 |
| <b>Ut</b> | BP | GO:0035108~limb morphogenesis                        | 6  | 0.00000567 |
| <b>Ut</b> | BP | GO:0035107~appendage morphogenesis                   | 6  | 0.00000567 |
| <b>Ut</b> | BP | GO:0060173~limb development                          | 6  | 0.00000671 |
| <b>Ut</b> | BP | GO:0048736~appendage development                     | 6  | 0.00000671 |
| <b>Ut</b> | BP | GO:0051216~cartilage development                     | 5  | 0.0000281  |
| <b>Ut</b> | BP | GO:0060429~epithelium development                    | 7  | 0.0000288  |
| <b>Ut</b> | CC | GO:0031012~extracellular matrix                      | 7  | 0.0000414  |
| <b>Ut</b> | CC | GO:0005576~extracellular region                      | 13 | 0.0000818  |
| <b>Vg</b> | CC | GO:0005576~extracellular region                      | 21 | 8.99E-14   |
| <b>Vg</b> | BP | GO:0042628~mating plug formation                     | 3  | 0.00000617 |
| <b>Vg</b> | BP | GO:0045297~post-mating behavior                      | 3  | 0.00000617 |
| <b>Vg</b> | BP | GO:0007320~insemination                              | 3  | 0.0000573  |
| <b>Vg</b> | BP | GO:0007620~copulation                                | 3  | 0.0000573  |
| <b>Vg</b> | BP | GO:0019098~reproductive behavior                     | 3  | 0.000347   |
| <b>Vg</b> | BP | GO:0007618~mating                                    | 3  | 0.000347   |
| <b>Vg</b> | CC | GO:0005615~extracellular space                       | 6  | 0.00301    |
| <b>Vg</b> | MF | GO:0008131~amine oxidase activity                    | 2  | 0.0114     |
| <b>Vg</b> | MF | GO:0048038~quinone binding                           | 2  | 0.0128     |

70 **Supplementary Table S4. Number of tissue-specific genes using different FC thresholds.**

71 Tissues were sorted in descending order by the third column (FC $\geq$ 4).

| Tissue     | Fold Change (FC) |      |      |      |     |
|------------|------------------|------|------|------|-----|
|            | 2                | 4    | 8    | 16   | 32  |
| <b>Te</b>  | 4051             | 2496 | 1635 | 1037 | 650 |
| <b>Br</b>  | 1349             | 708  | 364  | 138  | 39  |
| <b>Li</b>  | 421              | 280  | 208  | 156  | 107 |
| <b>Sp</b>  | 557              | 223  | 76   | 23   | 3   |
| <b>Fs</b>  | 347              | 208  | 143  | 79   | 38  |
| <b>Th</b>  | 579              | 201  | 92   | 45   | 18  |
| <b>Ki</b>  | 306              | 154  | 87   | 52   | 22  |
| <b>Sin</b> | 308              | 153  | 99   | 65   | 48  |
| <b>Mu</b>  | 264              | 128  | 78   | 50   | 33  |
| <b>Ov</b>  | 263              | 100  | 40   | 15   | 5   |
| <b>Lu</b>  | 272              | 95   | 34   | 19   | 15  |
| <b>Ag</b>  | 159              | 53   | 23   | 14   | 13  |
| <b>Vg</b>  | 105              | 52   | 36   | 29   | 23  |
| <b>Lin</b> | 152              | 49   | 23   | 10   | 5   |
| <b>Ut</b>  | 150              | 48   | 17   | 5    | 3   |
| <b>He</b>  | 109              | 46   | 27   | 18   | 11  |
| <b>St</b>  | 103              | 41   | 4    | 0    | 0   |

72

73

74

75

76

77

78

79



80 **Supplementary Table S5. Expression profiles of 27 consistently and highly expressed**  
81 **genes.** The “fpkm” column indicates mean fpkm value across all 17 tissues. “sd” and “se”  
82 stand for standard deviation and standard error respectively.

| <b>NO.</b> | <b>gene</b> | <b>fpkm</b> | <b>sd</b> | <b>se</b> |
|------------|-------------|-------------|-----------|-----------|
| <b>1</b>   | Arf1        | 216.4004    | 71.5760   | 17.3597   |
| <b>2</b>   | Cox7a2l     | 157.9276    | 44.8052   | 10.8669   |
| <b>3</b>   | D8ErtD738e  | 87.8149     | 21.0976   | 5.1169    |
| <b>4</b>   | Eif1        | 328.4951    | 74.7391   | 18.1269   |
| <b>5</b>   | Eif4g2      | 271.2178    | 86.8054   | 21.0534   |
| <b>6</b>   | Eif5a       | 274.2647    | 93.5881   | 22.6984   |
| <b>7</b>   | Gabarap     | 246.6964    | 61.3683   | 14.8840   |
| <b>8</b>   | Grcc10      | 118.7790    | 34.1299   | 8.2777    |
| <b>9</b>   | Myeov2      | 137.9045    | 38.7013   | 9.3865    |
| <b>10</b>  | Ndufa2      | 163.5554    | 47.0850   | 11.4198   |
| <b>11</b>  | Ndufa7      | 158.1495    | 45.3430   | 10.9973   |
| <b>12</b>  | Nedd8       | 136.7558    | 36.2726   | 8.7974    |
| <b>13</b>  | Oaz1        | 251.1923    | 72.5944   | 17.6067   |
| <b>14</b>  | Pomp        | 144.5918    | 48.5043   | 11.7640   |
| <b>15</b>  | Psma2       | 117.5557    | 39.7861   | 9.6495    |
| <b>16</b>  | Psma3       | 162.6351    | 47.1668   | 11.4396   |
| <b>17</b>  | Psma4       | 113.0226    | 28.6832   | 6.9567    |
| <b>18</b>  | Psemb1      | 121.6363    | 28.7887   | 6.9823    |
| <b>19</b>  | Psemb2      | 87.5236     | 22.9753   | 5.5723    |
| <b>20</b>  | Psemb3      | 127.3378    | 36.7318   | 8.9088    |
| <b>21</b>  | Psemb4      | 137.0849    | 30.1077   | 7.3022    |
| <b>22</b>  | Psemb6      | 129.3216    | 33.1271   | 8.0345    |
| <b>23</b>  | Psemb7      | 142.6789    | 47.9245   | 11.6234   |
| <b>24</b>  | Rab1b       | 78.3410     | 13.1423   | 3.1875    |
| <b>25</b>  | Saraf       | 102.9171    | 30.4342   | 7.3814    |
| <b>26</b>  | Ubl5        | 184.7515    | 45.1253   | 10.9445   |
| <b>27</b>  | Vcp         | 111.2268    | 30.7782   | 7.4648    |

83
